# Supplementary material for: Safety of different carotid artery revascularization strategies in the coronary artery bypass graft population: study protocol for a systematic review and network meta-analysis
Source: PubMed Central journal article supplement — Ann Transl Med. 2020 Dec;8(23):1605. doi: 10.21037/atm-20-4451 (PMC7791227; doi:10.21037/atm-20-4451), 2020-12
Supplement: atm-08-23-1605-rc.pdf [file atm-08-23-1605-rc.pdf]

# PRISMA-P 2015 Checklist

| Section/topic                     | #  | Checklist item                                                                                                                                                                                  | Information reported                |                                     | Line number(s) | Reported on<br>Section/Paragraph |
|-----------------------------------|----|-------------------------------------------------------------------------------------------------------------------------------------------------------------------------------------------------|-------------------------------------|-------------------------------------|----------------|----------------------------------|
|                                   |    |                                                                                                                                                                                                 | Yes                                 | No                                  |                |                                  |
| <b>ADMINISTRATIVE INFORMATION</b> |    |                                                                                                                                                                                                 |                                     |                                     |                |                                  |
| <b>Title</b>                      |    |                                                                                                                                                                                                 |                                     |                                     |                |                                  |
| Identification                    | 1a | Identify the report as a protocol of a systematic review                                                                                                                                        | <input checked="" type="checkbox"/> | <input type="checkbox"/>            | 3-4            | Title                            |
| Update                            | 1b | If the protocol is for an update of a previous systematic review, identify as such                                                                                                              | <input type="checkbox"/>            | <input checked="" type="checkbox"/> | N/A            | N/A                              |
| <b>Registration</b>               | 2  | If registered, provide the name of the registry (e.g., PROSPERO) and registration number in the Abstract                                                                                        | <input checked="" type="checkbox"/> | <input type="checkbox"/>            | 58             | Abstract/para4                   |
| <b>Authors</b>                    |    |                                                                                                                                                                                                 |                                     |                                     |                |                                  |
| Contact                           | 3a | Provide name, institutional affiliation, and e-mail address of all protocol authors; provide physical mailing address of corresponding author                                                   | <input checked="" type="checkbox"/> | <input type="checkbox"/>            | 6-21           | Title page                       |
| Contributions                     | 3b | Describe contributions of protocol authors and identify the guarantor of the review                                                                                                             | <input checked="" type="checkbox"/> | <input type="checkbox"/>            | 22-29          | Title page                       |
| <b>Amendments</b>                 | 4  | If the protocol represents an amendment of a previously completed or published protocol, identify as such and list changes; otherwise, state plan for documenting important protocol amendments | <input type="checkbox"/>            | <input checked="" type="checkbox"/> | N/A            | N/A                              |
| <b>Support</b>                    |    |                                                                                                                                                                                                 |                                     |                                     |                |                                  |
| Sources                           | 5a | Indicate sources of financial or other support for the review                                                                                                                                   | <input checked="" type="checkbox"/> | <input type="checkbox"/>            | 265-269        | Funding statement                |
| Sponsor                           | 5b | Provide name for the review funder and/or sponsor                                                                                                                                               | <input checked="" type="checkbox"/> | <input type="checkbox"/>            | 265-269        | Funding statement                |
| Role of sponsor/funder            | 5c | Describe roles of funder(s), sponsor(s), and/or institution(s), if any, in developing the protocol                                                                                              | <input checked="" type="checkbox"/> | <input type="checkbox"/>            | 268-269        | Funding statement                |
| <b>INTRODUCTION</b>               |    |                                                                                                                                                                                                 |                                     |                                     |                |                                  |
| <b>Rationale</b>                  | 6  | Describe the rationale for the review in the context of what is already known                                                                                                                   | <input checked="" type="checkbox"/> | <input type="checkbox"/>            | 60-82          | Introduction/Para1-2             |
| <b>Objectives</b>                 | 7  | Provide an explicit statement of the question(s) the review will address with reference to participants, interventions, comparators, and outcomes (PICO)                                        | <input checked="" type="checkbox"/> | <input type="checkbox"/>            | 83-99          | Introduction/Para3-4             |
| <b>METHODS</b>                    |    |                                                                                                                                                                                                 |                                     |                                     |                |                                  |
| <b>Eligibility criteria</b>       | 8  | Specify the study characteristics (e.g., PICO, study design, setting, time frame) and report characteristics (e.g., years considered, language, publication status) to be used as criteria for  | <input checked="" type="checkbox"/> | <input type="checkbox"/>            | 107-141        | Methods/para3-8                  |

| Section/topic                             | #   | Checklist item                                                                                                                                                                                                                              | Information reported                |                                     | Line number(s)  | Reported on Section/Paragraph |
|-------------------------------------------|-----|---------------------------------------------------------------------------------------------------------------------------------------------------------------------------------------------------------------------------------------------|-------------------------------------|-------------------------------------|-----------------|-------------------------------|
|                                           |     |                                                                                                                                                                                                                                             | Yes                                 | No                                  |                 |                               |
|                                           |     | eligibility for the review                                                                                                                                                                                                                  |                                     |                                     |                 |                               |
| <b>Information sources</b>                | 9   | Describe all intended information sources (e.g., electronic databases, contact with study authors, trial registers, or other grey literature sources) with planned dates of coverage                                                        | <input checked="" type="checkbox"/> | <input type="checkbox"/>            | 143-144,155-157 | Methods/para9                 |
| <b>Search strategy</b>                    | 10  | Present draft of search strategy to be used for at least one electronic database, including planned limits, such that it could be repeated                                                                                                  | <input checked="" type="checkbox"/> | <input type="checkbox"/>            | 142-157         | Methods/para9                 |
| <b>STUDY RECORDS</b>                      |     |                                                                                                                                                                                                                                             |                                     |                                     |                 |                               |
| Data management                           | 11a | Describe the mechanism(s) that will be used to manage records and data throughout the review                                                                                                                                                | <input checked="" type="checkbox"/> | <input type="checkbox"/>            | 158-160         | Methods/para10                |
| Selection process                         | 11b | State the process that will be used for selecting studies (e.g., two independent reviewers) through each phase of the review (i.e., screening, eligibility, and inclusion in meta-analysis)                                                 | <input checked="" type="checkbox"/> | <input type="checkbox"/>            | 160-164         | Methods/para10                |
| Data collection process                   | 11c | Describe planned method of extracting data from reports (e.g., piloting forms, done independently, in duplicate), any processes for obtaining and confirming data from investigators                                                        | <input checked="" type="checkbox"/> | <input type="checkbox"/>            | 165-170         | Methods/para11                |
| <b>Data items</b>                         | 12  | List and define all variables for which data will be sought (e.g., PICO items, funding sources), any pre-planned data assumptions and simplifications                                                                                       | <input checked="" type="checkbox"/> | <input type="checkbox"/>            | 168-170         | Methods/para11                |
| <b>Outcomes and prioritization</b>        | 13  | List and define all outcomes for which data will be sought, including prioritization of main and additional outcomes, with rationale                                                                                                        | <input checked="" type="checkbox"/> | <input type="checkbox"/>            | 123-133         | Methods/para6                 |
| <b>Risk of bias in individual studies</b> | 14  | Describe anticipated methods for assessing risk of bias of individual studies, including whether this will be done at the outcome or study level, or both; state how this information will be used in data synthesis                        | <input checked="" type="checkbox"/> | <input type="checkbox"/>            | 171-176         | Methods/para12                |
| <b>DATA</b>                               |     |                                                                                                                                                                                                                                             |                                     |                                     |                 |                               |
| <b>Synthesis</b>                          | 15a | Describe criteria under which study data will be quantitatively synthesized                                                                                                                                                                 | <input checked="" type="checkbox"/> | <input type="checkbox"/>            | 177-180         | Methods/para13                |
|                                           | 15b | If data are appropriate for quantitative synthesis, describe planned summary measures, methods of handling data, and methods of combining data from studies, including any planned exploration of consistency (e.g., $I^2$ , Kendall's tau) | <input checked="" type="checkbox"/> | <input type="checkbox"/>            | 181-212         | Methods/para13-15             |
|                                           | 15c | Describe any proposed additional analyses (e.g., sensitivity or subgroup analyses, meta-regression)                                                                                                                                         | <input checked="" type="checkbox"/> | <input type="checkbox"/>            | 213-241         | Methods/para16-18             |
|                                           | 15d | If quantitative synthesis is not appropriate, describe the type of summary planned                                                                                                                                                          | <input type="checkbox"/>            | <input checked="" type="checkbox"/> | N/A             | N/A                           |
| <b>Meta-bias(es)</b>                      | 16  | Specify any planned assessment of meta-bias(es) (e.g., publication bias across studies, selective reporting within studies)                                                                                                                 | <input checked="" type="checkbox"/> | <input type="checkbox"/>            | 241-243         | Methods/para19                |

| Section/topic                            | #  | Checklist item                                                                   | Information reported                |                          | Line number(s) | Reported on Section/Paragraph |
|------------------------------------------|----|----------------------------------------------------------------------------------|-------------------------------------|--------------------------|----------------|-------------------------------|
|                                          |    |                                                                                  | Yes                                 | No                       |                |                               |
| <b>Confidence in cumulative evidence</b> | 17 | Describe how the strength of the body of evidence will be assessed (e.g., GRADE) | <input checked="" type="checkbox"/> | <input type="checkbox"/> | 244-249        | Methods/para20                |

**Article Information:** <http://dx.doi.org/10.21037/atm-20-4451>

\*As the checklist was provided upon initial submission, the page number/line number reported may be changed due to copyediting and may not be referable in the published version. In this case, the section/paragraph may be used as an alternative reference.
